# Supplementary material for: Prebiotics alleviate cartilage degradation and inflammation in post-traumatic osteoarthritic mice by modulating the gut barrier and fecal metabolomics
Source: Royal Society of Chemistry journal article supplement (doi:10.1039/d3fo00775h), 2023-01-01
Supplement: d3fo00775h1.pdf [file d3fo00775h1.pdf]

**Supplementary table 1 220 differentially expressed metabolites in model group and sham group.**

| Metabolite Formula | Fold Change | VIP  | <i>P</i> Value |
|--------------------|-------------|------|----------------|
| C32H60NO10P        | 2.62        | 2.28 | 0.00           |
| C40H64O            | 3.91        | 1.59 | 0.03           |
| C20H34O6           | 0.61        | 1.71 | 0.02           |
| C30H47O4P          | 0.63        | 1.67 | 0.02           |
| C13H26N2           | 0.09        | 2.25 | 0.00           |
| C22H43NO2          | 1.78        | 1.99 | 0.00           |
| C30H52O            | 1.49        | 1.81 | 0.01           |
| C30H50O            | 1.48        | 1.72 | 0.02           |
| C27H46O6           | 2.24        | 2.01 | 0.00           |
| C23H41NO5          | 0.40        | 1.93 | 0.01           |
| C22H43NO5          | 0.28        | 1.84 | 0.01           |
| C20H22O3           | 0.36        | 1.64 | 0.01           |
| C19H28O4           | 0.46        | 1.81 | 0.01           |
| C17H31NO5          | 5.55        | 1.69 | 0.02           |
| C13H12O4           | 0.08        | 1.92 | 0.00           |
| C24H36O5           | 0.55        | 1.49 | 0.04           |
| C22H41NO5          | 0.23        | 2.09 | 0.00           |
| C22H36O2           | 0.23        | 1.85 | 0.01           |
| C22H36O5           | 0.48        | 2.23 | 0.00           |
| C17H37NO2          | 1.20        | 1.45 | 0.05           |
| C47H76O2           | 6.40        | 1.82 | 0.01           |
| C32H61NO4          | 2.98        | 2.10 | 0.00           |
| C35H71NO4          | 2.88        | 1.75 | 0.02           |
| C42H81NO3          | 0.26        | 1.69 | 0.03           |
| C34H69NO4          | 3.58        | 1.73 | 0.02           |
| C13H12O8           | 0.33        | 1.76 | 0.01           |
| C43H74O5           | 6.79        | 1.97 | 0.00           |
| C32H67NO2          | 4.28        | 1.59 | 0.03           |
| C44H78O4           | 2.27        | 1.67 | 0.04           |
| C8H17NO2           | 1.76        | 1.87 | 0.01           |
| C16H32O2           | 0.61        | 1.53 | 0.04           |
| C36H70O2           | 3.54        | 1.63 | 0.03           |
| C21H44O5P          | 0.28        | 1.93 | 0.00           |
| C34H66O4           | 4.20        | 1.58 | 0.04           |
| C34H64O4           | 3.59        | 1.50 | 0.05           |
| C66H121NO23        | 0.10        | 1.86 | 0.01           |
| C11H20N2O5         | 2.79        | 1.81 | 0.01           |
| C62H114N2O23       | 0.35        | 1.60 | 0.03           |
| C11H14NO4P         | 0.08        | 1.97 | 0.00           |
| C14H26O10          | 0.62        | 1.66 | 0.02           |
| C9H17NO4           | 5.32        | 1.72 | 0.01           |

---

|             |      |      |      |
|-------------|------|------|------|
| C30H45N3O9S | 0.31 | 1.66 | 0.03 |
| C24H50NO7P  | 1.51 | 1.65 | 0.02 |
| C26H54NO7P  | 1.54 | 1.51 | 0.05 |
| C26H52NO7P  | 1.35 | 1.51 | 0.05 |
| C23H31NO2   | 0.28 | 1.97 | 0.00 |
| C19H36O3    | 1.64 | 1.93 | 0.01 |
| C27H54O4    | 2.05 | 1.61 | 0.03 |
| C19H28N2O5S | 0.33 | 1.51 | 0.05 |
| C23H33NO4   | 0.14 | 2.24 | 0.00 |
| C32H46N2O3  | 0.49 | 1.54 | 0.04 |
| C26H39N3O3  | 1.72 | 1.71 | 0.02 |
| C14H16N2O4  | 2.56 | 1.70 | 0.02 |
| C22H45NO5   | 0.28 | 1.79 | 0.01 |
| C26H53NO3   | 1.47 | 1.72 | 0.02 |
| C32H65NO7   | 3.20 | 1.50 | 0.05 |
| C30H44N2O6  | 0.48 | 1.67 | 0.03 |
| C22H40O4    | 0.64 | 1.63 | 0.04 |
| C47H85O8P   | 0.06 | 2.00 | 0.00 |
| C46H79O8P   | 0.07 | 1.99 | 0.00 |
| C20H39NO3S  | 0.27 | 1.75 | 0.02 |
| C32H62NO8P  | 0.31 | 1.85 | 0.01 |
| C39H72NO8P  | 0.49 | 2.19 | 0.00 |
| C47H78NO8P  | 0.23 | 1.73 | 0.02 |
| C49H76NO8P  | 0.26 | 1.98 | 0.00 |
| C40H73O10P  | 1.97 | 1.82 | 0.01 |
| C26H53O9P   | 1.62 | 1.53 | 0.04 |
| C43H85O10P  | 0.18 | 1.78 | 0.01 |
| C37H73O9P   | 0.50 | 2.16 | 0.00 |
| C42H80O13P2 | 0.09 | 1.81 | 0.01 |
| C42H76O13P2 | 0.07 | 2.04 | 0.00 |
| C48H78O13P2 | 0.39 | 2.01 | 0.00 |
| C43H81O13P  | 0.27 | 2.00 | 0.00 |
| C43H79O13P  | 0.12 | 1.96 | 0.00 |
| C41H76O16P2 | 0.59 | 1.71 | 0.01 |
| C10H19NO4   | 5.68 | 1.57 | 0.03 |
| C44H80NO10P | 0.10 | 1.91 | 0.01 |
| C46H78NO10P | 0.30 | 2.11 | 0.00 |
| C48H74NO10P | 0.09 | 1.85 | 0.01 |
| C26H38O7    | 0.42 | 1.93 | 0.00 |
| C50H94O6    | 1.96 | 2.02 | 0.00 |
| C55H96O5    | 0.32 | 1.72 | 0.02 |
| C12H27O3P   | 9.32 | 1.74 | 0.01 |
| C12H24NO4   | 1.39 | 2.05 | 0.00 |
| C21H32O5    | 8.70 | 1.69 | 0.03 |

---

---

|            |      |      |      |
|------------|------|------|------|
| C19H30O4   | 0.53 | 1.69 | 0.03 |
| C11H16O6S  | 1.52 | 1.67 | 0.04 |
| C21H43NO4  | 0.43 | 1.73 | 0.02 |
| C15H14O8S  | 0.27 | 1.83 | 0.02 |
| C7H9NO5    | 1.46 | 1.81 | 0.03 |
| C8H10N4O3  | 0.54 | 1.99 | 0.00 |
| C25H36O4   | 0.57 | 1.90 | 0.01 |
| C29H50O3   | 0.56 | 1.88 | 0.01 |
| C20H38O3   | 3.66 | 1.99 | 0.01 |
| C23H34O4   | 0.27 | 2.53 | 0.00 |
| C24H40O6   | 2.17 | 1.92 | 0.01 |
| C9H10O5    | 0.57 | 1.84 | 0.02 |
| C11H15NO4S | 0.67 | 1.73 | 0.04 |
| C28H53NO5  | 1.46 | 1.69 | 0.03 |
| C30H47O4P  | 0.53 | 1.91 | 0.01 |
| C3H4O3     | 0.79 | 1.87 | 0.02 |
| C6H10O3    | 0.47 | 1.84 | 0.02 |
| C9H13N3O4S | 0.65 | 1.81 | 0.03 |
| C17H18N2O8 | 0.64 | 1.66 | 0.04 |
| C10H10O4   | 0.36 | 1.86 | 0.02 |
| C23H38O3   | 0.66 | 1.61 | 0.04 |
| C9H12N2O4  | 0.65 | 2.12 | 0.00 |
| C15H24O3   | 0.09 | 2.59 | 0.00 |
| C8H12O6    | 1.99 | 1.89 | 0.01 |
| C15H10O5   | 0.31 | 2.09 | 0.01 |
| C17H24N2O4 | 0.39 | 2.25 | 0.00 |
| C15H10O4   | 0.10 | 2.07 | 0.01 |
| C27H48O2   | 0.47 | 1.93 | 0.01 |
| C24H40O5   | 0.24 | 1.90 | 0.02 |
| C33H50O4   | 4.08 | 2.06 | 0.01 |
| C22H29NO2  | 3.47 | 1.54 | 0.05 |
| C20H24N8O6 | 0.42 | 1.60 | 0.05 |
| C19H19N3O3 | 0.11 | 2.53 | 0.00 |
| C22H39O6   | 0.31 | 1.90 | 0.01 |
| C14H26O3   | 0.52 | 2.35 | 0.00 |
| C30H46O4   | 0.35 | 1.83 | 0.02 |
| C11H8O3    | 1.51 | 1.74 | 0.03 |
| C24H38O5   | 0.32 | 1.93 | 0.01 |
| C25H38O4   | 0.24 | 2.02 | 0.01 |
| C27H44O5   | 0.42 | 2.13 | 0.00 |
| C12H10N4O3 | 0.69 | 1.75 | 0.03 |
| C16H22O4   | 0.61 | 1.92 | 0.01 |
| C5H8O3     | 0.51 | 1.98 | 0.01 |
| C24H42O7   | 5.19 | 1.85 | 0.02 |

---

---

|              |      |      |      |
|--------------|------|------|------|
| C10H19N3O4   | 0.62 | 1.71 | 0.03 |
| C7H6O2       | 0.73 | 1.70 | 0.04 |
| C45H76O2     | 5.85 | 1.91 | 0.01 |
| C42H85NO3    | 4.66 | 1.63 | 0.04 |
| C38H71NO3    | 5.09 | 1.63 | 0.03 |
| C61H110O17P2 | 0.32 | 1.65 | 0.05 |
| C24H49NO7    | 5.81 | 1.99 | 0.01 |
| C44H86O5     | 0.36 | 1.97 | 0.01 |
| C21H43O6P    | 1.38 | 1.71 | 0.04 |
| C15H20O4     | 0.70 | 1.81 | 0.02 |
| C36H38N4O4   | 2.05 | 1.95 | 0.01 |
| C20H44NO5P   | 0.24 | 1.90 | 0.02 |
| C8H14N2O5S   | 1.28 | 1.74 | 0.03 |
| C30H46O8     | 1.32 | 1.77 | 0.02 |
| C16H30O4     | 1.75 | 1.55 | 0.05 |
| C13H18O4     | 0.69 | 1.60 | 0.05 |
| C5H4N4O      | 1.64 | 1.64 | 0.04 |
| C11H14NO4P   | 0.11 | 2.11 | 0.00 |
| C27H30O15    | 0.47 | 1.78 | 0.02 |
| C69H124N2O31 | 0.06 | 1.78 | 0.03 |
| C12H18N2O4   | 0.50 | 1.97 | 0.01 |
| C12H23O14P   | 0.54 | 2.27 | 0.00 |
| C25H48NO7P   | 1.69 | 1.72 | 0.03 |
| C34H38N4O4   | 1.58 | 1.93 | 0.01 |
| C18H41N2O5P  | 0.65 | 1.59 | 0.04 |
| C27H41NO4    | 4.33 | 2.08 | 0.00 |
| C17H18N6O5   | 0.40 | 2.07 | 0.01 |
| C20H22N2O7   | 1.21 | 1.65 | 0.05 |
| C12H18NO5P   | 1.23 | 1.80 | 0.02 |
| C11H16N2O8   | 1.24 | 1.63 | 0.05 |
| C11H11NO5    | 2.35 | 2.03 | 0.01 |
| C13H23N3O2   | 0.09 | 2.59 | 0.00 |
| C23H37NO5    | 0.33 | 1.92 | 0.01 |
| C27H43NO3    | 0.65 | 1.88 | 0.01 |
| C19H37NO3    | 3.36 | 1.96 | 0.01 |
| C10H18N4O6   | 0.52 | 1.91 | 0.02 |
| C11H15N3O6   | 0.67 | 1.68 | 0.04 |
| C9H17NO8     | 0.63 | 1.67 | 0.04 |
| C10H18N2O6   | 0.68 | 1.69 | 0.03 |
| C5H6O5       | 0.59 | 1.95 | 0.01 |
| C13H16O7     | 0.54 | 1.85 | 0.02 |
| C7H8O4S      | 0.20 | 1.61 | 0.04 |
| C45H83O8P    | 1.93 | 1.87 | 0.01 |
| C45H69O8P    | 0.23 | 1.66 | 0.05 |

---

---

|              |      |      |      |
|--------------|------|------|------|
| C46H83O8P    | 1.83 | 1.96 | 0.01 |
| C41H77O7P    | 4.49 | 1.68 | 0.04 |
| C33H63O7P    | 0.67 | 2.12 | 0.00 |
| C45H82NO8P   | 1.84 | 2.13 | 0.00 |
| C27H50NO7P   | 1.31 | 1.67 | 0.03 |
| C48H90NO7P   | 2.16 | 1.69 | 0.04 |
| C52H84NO8P   | 0.29 | 1.64 | 0.04 |
| C44H90NO7P   | 2.18 | 1.70 | 0.03 |
| C20H44NO6P   | 1.45 | 1.65 | 0.04 |
| C44H80NO8P   | 2.07 | 2.13 | 0.00 |
| C46H92NO8P   | 0.54 | 1.71 | 0.04 |
| C23H47O9P    | 1.71 | 1.93 | 0.01 |
| C45H81O10P   | 0.11 | 2.00 | 0.01 |
| C45H83O10P   | 0.21 | 1.94 | 0.01 |
| C26H55O8P    | 1.70 | 1.70 | 0.03 |
| C24H49O8P    | 3.29 | 1.68 | 0.05 |
| C42H71O13P   | 0.36 | 2.22 | 0.00 |
| C43H81O13P   | 0.45 | 1.78 | 0.03 |
| C53H97O13P   | 3.39 | 1.73 | 0.02 |
| C25H51O11P   | 1.28 | 1.64 | 0.04 |
| C49H85O12P   | 1.97 | 1.75 | 0.03 |
| C25H49O11P   | 2.56 | 2.25 | 0.00 |
| C44H82NO10P  | 0.22 | 1.92 | 0.01 |
| C44H78NO10P  | 0.55 | 1.60 | 0.05 |
| C44H80NO10P  | 0.15 | 1.90 | 0.01 |
| C46H80NO10P  | 0.46 | 1.77 | 0.03 |
| C25H48NO9P   | 3.92 | 1.78 | 0.03 |
| C50H92NO10P  | 1.98 | 1.66 | 0.03 |
| C45H76NO12P  | 0.34 | 2.06 | 0.01 |
| C41H82NO9P   | 1.73 | 1.87 | 0.01 |
| C17H20N4O6   | 0.61 | 1.73 | 0.03 |
| C14H21N3O10S | 0.42 | 2.08 | 0.00 |
| C4H9NO2Se    | 1.35 | 1.85 | 0.02 |
| C46H94N2O6P  | 2.49 | 1.74 | 0.02 |
| C18H40NO5P   | 7.84 | 1.66 | 0.03 |
| C26H45NO10S2 | 0.03 | 1.62 | 0.05 |
| C49H98O4     | 3.37 | 1.78 | 0.02 |
| C50H92O6     | 2.19 | 1.60 | 0.04 |
| C54H92O6     | 1.98 | 1.60 | 0.05 |
| C53H98O5     | 2.51 | 2.05 | 0.00 |
| C53H96O5     | 3.55 | 1.81 | 0.02 |
| C58H92O6     | 3.74 | 2.02 | 0.01 |
| C56H104O5    | 6.06 | 2.22 | 0.00 |
| C30H56O7     | 3.03 | 1.74 | 0.03 |

---

---

|          |      |      |      |
|----------|------|------|------|
| C6H6N2O2 | 0.56 | 1.66 | 0.04 |
| C6H9NO3  | 0.50 | 1.57 | 0.05 |
| C11H6O4  | 0.13 | 2.20 | 0.00 |

---

**Supplementary table 2 276 differentially expressed metabolites in prebiotics group and model group.**

| Metabolite Formula | Fold Change | VIP  | P Value |
|--------------------|-------------|------|---------|
| C15H12O4           | 3.53        | 2.10 | 0.00    |
| C9H12O5            | 0.54        | 1.70 | 0.02    |
| C11H16O6S          | 0.87        | 1.80 | 0.02    |
| C16H29N3O2         | 1.62        | 1.66 | 0.04    |
| C19H41O6P          | 0.57        | 1.98 | 0.00    |
| C6H8N2O2           | 0.39        | 1.74 | 0.02    |
| C24H40O5S          | 1.47        | 1.61 | 0.03    |
| C9H10O5            | 2.22        | 2.15 | 0.00    |
| C11H19N4O4         | 0.48        | 1.66 | 0.03    |
| C23H44O3           | 2.34        | 1.95 | 0.01    |
| C7H9N3O2           | 0.67        | 1.59 | 0.03    |
| C8H11NO6           | 0.52        | 1.72 | 0.02    |
| C28H53NO5          | 0.53        | 1.68 | 0.02    |
| C12H9NO5           | 0.80        | 1.53 | 0.05    |
| C30H47O4P          | 1.68        | 1.65 | 0.03    |
| C26H52O3           | 2.69        | 1.64 | 0.03    |
| C21H43NO3          | 2.36        | 2.00 | 0.00    |
| C24H44O3           | 2.56        | 1.70 | 0.02    |
| C7H12O5            | 0.44        | 1.92 | 0.01    |
| C6H10O3            | 2.62        | 2.24 | 0.00    |
| C16H16O11          | 0.47        | 1.71 | 0.02    |
| C10H12O5           | 0.57        | 1.65 | 0.03    |
| C7H6O4             | 0.73        | 1.66 | 0.03    |
| C22H44O3           | 2.42        | 2.03 | 0.00    |
| C22H37NO5S         | 3.29        | 1.89 | 0.01    |
| C24H48O3           | 1.73        | 1.91 | 0.01    |
| C9H10O3            | 0.66        | 1.56 | 0.04    |
| C11H14O4           | 0.86        | 1.72 | 0.02    |
| C17H18N2O8         | 1.75        | 1.67 | 0.03    |
| C10H10O4           | 2.30        | 1.76 | 0.02    |
| C13H12O3           | 1.46        | 1.54 | 0.05    |
| C25H48O3           | 1.90        | 2.00 | 0.00    |
| C13H16O3           | 0.77        | 1.72 | 0.02    |
| C6H12O3            | 0.50        | 1.65 | 0.03    |
| C20H40O3           | 1.79        | 1.64 | 0.03    |
| C19H38O3           | 2.05        | 1.58 | 0.04    |
| C4H6O4             | 0.55        | 1.81 | 0.01    |
| C15H24O3           | 7.45        | 1.52 | 0.04    |
| C24H46O3           | 2.36        | 2.03 | 0.00    |
| C15H10O4           | 3.48        | 2.21 | 0.00    |
| C24H40O5           | 3.27        | 2.09 | 0.00    |

---

|               |      |      |      |
|---------------|------|------|------|
| C12H15NO3     | 0.54 | 1.73 | 0.02 |
| C14H20O4      | 0.74 | 1.62 | 0.04 |
| C28H46O3      | 0.54 | 1.67 | 0.02 |
| C21H20O8      | 0.40 | 1.88 | 0.01 |
| C6H13O7PS     | 0.60 | 1.57 | 0.04 |
| C10H15N2O8P   | 5.90 | 1.94 | 0.01 |
| C18H16O8      | 0.69 | 1.55 | 0.05 |
| C10H11N5O4    | 0.58 | 2.10 | 0.00 |
| C27H48O4      | 0.11 | 2.04 | 0.00 |
| C22H39O6      | 4.04 | 2.27 | 0.00 |
| C20H20O10     | 1.45 | 1.85 | 0.01 |
| C8H13N3OS     | 1.43 | 1.56 | 0.04 |
| C14H26O3      | 2.20 | 1.85 | 0.01 |
| C18H32O2      | 5.51 | 1.94 | 0.01 |
| C18H14O4      | 0.54 | 1.56 | 0.04 |
| C24H38O5      | 2.50 | 2.16 | 0.00 |
| C22H42O3      | 2.44 | 1.80 | 0.02 |
| C3H4O         | 0.62 | 1.61 | 0.04 |
| C5H8N5O4P     | 0.52 | 1.75 | 0.02 |
| C5H8O3        | 2.35 | 2.12 | 0.00 |
| C23H39NO3     | 0.63 | 1.82 | 0.01 |
| C9H16O4       | 0.81 | 1.60 | 0.04 |
| C7H6O2        | 1.65 | 2.00 | 0.01 |
| C2H5N3O3      | 0.57 | 1.79 | 0.02 |
| C41H75N3O15P2 | 2.38 | 1.82 | 0.01 |
| C34H69NO5     | 0.62 | 1.76 | 0.02 |
| C38H75NO3     | 0.49 | 1.54 | 0.04 |
| C67H122O17P2  | 2.79 | 2.21 | 0.00 |
| C9H14N3O8P    | 5.55 | 1.96 | 0.00 |
| C10H16N3O7P   | 0.63 | 1.76 | 0.02 |
| C42H70O7      | 0.60 | 1.75 | 0.02 |
| C42H74O5      | 0.69 | 1.55 | 0.04 |
| C42H72O5      | 0.69 | 1.54 | 0.05 |
| C47H84O5      | 0.60 | 1.53 | 0.05 |
| C44H80O5      | 0.39 | 1.75 | 0.02 |
| C42H82O5      | 2.79 | 1.70 | 0.03 |
| C24H31NO4     | 0.59 | 1.87 | 0.01 |
| C20H18O8      | 0.52 | 1.99 | 0.01 |
| C9H15NO5      | 0.47 | 1.86 | 0.01 |
| C20H44NO5P    | 3.22 | 2.09 | 0.00 |
| C18H39O3P     | 0.51 | 1.76 | 0.02 |
| C27H33N9O15P2 | 0.45 | 1.61 | 0.03 |
| C40H62O4      | 0.53 | 1.61 | 0.04 |
| C54H101NO13   | 0.04 | 2.06 | 0.00 |



---

|               |      |      |      |
|---------------|------|------|------|
| C38H71NO9     | 0.67 | 1.77 | 0.02 |
| C60H113N2O23P | 1.51 | 1.82 | 0.01 |
| C6H13NO8S     | 0.57 | 1.57 | 0.04 |
| C3H7N3O2      | 2.71 | 2.15 | 0.00 |
| C30H41NO6     | 0.69 | 1.78 | 0.02 |
| C29H48O5      | 1.47 | 1.51 | 0.05 |
| C10H18N2O4S   | 0.54 | 1.67 | 0.03 |
| C11H14NO4P    | 3.43 | 2.21 | 0.00 |
| C11H9NO3      | 1.92 | 1.62 | 0.04 |
| C10H13N4O8P   | 3.83 | 1.64 | 0.03 |
| C22H22O10     | 1.62 | 1.80 | 0.01 |
| C10H15N3O7    | 0.72 | 1.57 | 0.04 |
| C3H6O3        | 0.69 | 1.64 | 0.03 |
| C12H23NO10    | 0.36 | 2.21 | 0.00 |
| C19H39O6P     | 0.49 | 1.73 | 0.02 |
| C25H49O12P    | 0.62 | 1.69 | 0.02 |
| C6H12O4       | 0.49 | 2.10 | 0.00 |
| C25H48O4      | 3.01 | 1.96 | 0.00 |
| C21H42O3      | 2.19 | 1.83 | 0.01 |
| C16H31NO3     | 3.27 | 2.51 | 0.00 |
| C16H35N3O2    | 1.74 | 1.82 | 0.01 |
| C18H17NO5     | 1.25 | 1.58 | 0.04 |
| C17H18N6O5    | 2.21 | 1.72 | 0.02 |
| C16H18N2O3    | 0.46 | 1.60 | 0.03 |
| C16H34N2O2    | 0.68 | 1.63 | 0.03 |
| C30H43NO5     | 1.79 | 1.56 | 0.04 |
| C12H18NO5P    | 0.78 | 1.82 | 0.01 |
| C11H13NO3     | 0.63 | 1.74 | 0.02 |
| C7H12N2O4S    | 0.69 | 2.04 | 0.00 |
| C11H16N2O8    | 0.78 | 1.72 | 0.02 |
| C12H14N2O2    | 0.47 | 2.15 | 0.00 |
| C11H11NO5     | 0.55 | 1.58 | 0.03 |
| C7H13NO4      | 0.61 | 1.81 | 0.01 |
| C15H27N3O2    | 2.22 | 1.69 | 0.02 |
| C8H15NO4      | 0.53 | 1.56 | 0.04 |
| C23H37NO5     | 2.45 | 2.16 | 0.00 |
| C12H13N3O2    | 0.66 | 1.69 | 0.03 |
| C27H45NO3     | 0.53 | 1.74 | 0.02 |
| C23H45NO3     | 2.42 | 2.10 | 0.00 |
| C18H33NO3     | 0.47 | 1.87 | 0.01 |
| C17H28O3S     | 0.85 | 1.66 | 0.03 |
| C31H48N2O3    | 0.26 | 1.73 | 0.02 |
| C8H13NO5      | 0.54 | 1.78 | 0.02 |
| C21H35N5O2    | 0.72 | 1.72 | 0.02 |

---

|             |       |      |      |
|-------------|-------|------|------|
| C17H33NO4   | 0.56  | 2.04 | 0.00 |
| C5H6O5      | 1.88  | 1.79 | 0.02 |
| C9H17NO5    | 0.79  | 1.57 | 0.04 |
| C45H82NO8P  | 0.72  | 1.62 | 0.04 |
| C48H96NO8P  | 0.75  | 1.62 | 0.03 |
| C20H40NO8P  | 0.73  | 1.56 | 0.04 |
| C18H38NO6P  | 0.52  | 1.98 | 0.00 |
| C44H90NO7P  | 0.45  | 1.70 | 0.02 |
| C44H80NO8P  | 0.62  | 2.03 | 0.00 |
| C48H80NO8P  | 0.53  | 1.59 | 0.04 |
| C45H80NO8P  | 3.30  | 1.74 | 0.02 |
| C41H74NO7P  | 1.88  | 1.49 | 0.05 |
| C23H47O9P   | 0.63  | 2.27 | 0.00 |
| C45H81O10P  | 5.31  | 2.11 | 0.00 |
| C45H83O10P  | 3.42  | 2.16 | 0.00 |
| C40H77O9P   | 0.59  | 1.91 | 0.01 |
| C43H87O9P   | 0.47  | 1.94 | 0.01 |
| C22H45O8P   | 0.48  | 1.80 | 0.02 |
| C43H81O9P   | 0.74  | 1.58 | 0.04 |
| C48H78O13P2 | 2.32  | 2.35 | 0.00 |
| C6H6O       | 3.05  | 1.57 | 0.04 |
| C43H81O13P  | 1.92  | 2.15 | 0.00 |
| C3H6O2      | 0.59  | 1.71 | 0.02 |
| C20H38NO9P  | 1.43  | 1.52 | 0.05 |
| C44H82NO10P | 3.31  | 2.15 | 0.00 |
| C44H80NO10P | 4.02  | 2.21 | 0.00 |
| C46H80NO10P | 1.95  | 2.16 | 0.00 |
| C48H86NO10P | 2.99  | 1.72 | 0.02 |
| C28H52NO9P  | 0.63  | 1.71 | 0.02 |
| C45H76NO12P | 2.61  | 2.29 | 0.00 |
| C41H82NO9P  | 0.74  | 1.61 | 0.04 |
| C42H78NO9P  | 0.60  | 1.81 | 0.01 |
| C17H24N8O7S | 0.58  | 1.59 | 0.03 |
| C46H94N2O6P | 0.48  | 1.59 | 0.04 |
| C48H78O19   | 2.12  | 1.60 | 0.04 |
| C4H4O3      | 0.56  | 1.80 | 0.02 |
| C59H90O6    | 1.67  | 1.61 | 0.04 |
| C60H112O6   | 2.48  | 1.70 | 0.02 |
| C64H118O6   | 3.25  | 2.03 | 0.00 |
| C61H114O5   | 2.03  | 1.58 | 0.04 |
| C55H92O6    | 2.12  | 1.77 | 0.02 |
| C68H124O6   | 1.76  | 1.81 | 0.01 |
| C65H96O6    | 0.23  | 1.63 | 0.04 |
| C73H136O6   | 14.77 | 1.80 | 0.02 |

---

|               |      |      |      |
|---------------|------|------|------|
| C6H6N2O2      | 1.89 | 1.61 | 0.04 |
| C10H12N4O6    | 0.67 | 1.59 | 0.04 |
| C18H39O4P     | 5.28 | 2.02 | 0.00 |
| C17H16O7S     | 1.91 | 1.60 | 0.04 |
| C7H9N3O       | 0.83 | 1.88 | 0.01 |
| C33H51NO2     | 0.25 | 1.83 | 0.01 |
| C40H64O       | 0.15 | 1.73 | 0.02 |
| C16H32O3      | 1.58 | 1.64 | 0.04 |
| C30H54O7      | 0.67 | 1.70 | 0.03 |
| C8H8O7S       | 0.66 | 1.72 | 0.01 |
| C13H26N2      | 4.45 | 1.58 | 0.04 |
| C22H43NO2     | 0.68 | 1.83 | 0.01 |
| C30H52O       | 0.80 | 1.66 | 0.03 |
| C30H50O       | 0.79 | 1.72 | 0.02 |
| C21H37O4      | 0.93 | 1.57 | 0.04 |
| C22H43NO5     | 3.18 | 2.17 | 0.00 |
| C9H12O7S      | 0.67 | 1.50 | 0.05 |
| C20H22O3      | 2.53 | 1.58 | 0.02 |
| C11H14O6      | 0.29 | 2.02 | 0.00 |
| C7H16N2       | 0.56 | 1.59 | 0.03 |
| C7H15NO2      | 0.62 | 1.62 | 0.03 |
| C7H10N4O3     | 0.77 | 1.54 | 0.03 |
| C24H41NO      | 0.57 | 1.64 | 0.02 |
| C16H34N2O     | 0.51 | 1.49 | 0.03 |
| C33H54O4      | 0.63 | 1.42 | 0.04 |
| C13H12O4      | 3.67 | 2.19 | 0.00 |
| C6H6N4O       | 1.49 | 1.53 | 0.05 |
| C24H36O5      | 1.64 | 1.52 | 0.05 |
| C11H9NO4      | 0.77 | 1.53 | 0.03 |
| C22H41NO5     | 2.59 | 1.71 | 0.02 |
| C22H36O2      | 3.28 | 2.08 | 0.00 |
| C12H22O11     | 0.35 | 1.55 | 0.03 |
| C10H13NO2     | 0.59 | 1.54 | 0.04 |
| C9H14N2O7     | 2.18 | 1.52 | 0.04 |
| C51H91N3O15P2 | 1.49 | 1.46 | 0.04 |
| C42H81NO3     | 9.30 | 2.31 | 0.00 |
| C46H93NO3     | 0.44 | 2.15 | 0.00 |
| C34H69NO4     | 0.12 | 2.27 | 0.00 |
| C27H46O       | 0.69 | 1.59 | 0.03 |
| C13H12O8      | 2.34 | 1.48 | 0.04 |
| C19H21N7O6    | 0.49 | 1.47 | 0.04 |
| C9H15NO5      | 0.47 | 1.82 | 0.01 |
| C32H67NO2     | 0.14 | 1.71 | 0.02 |
| C41H80O16P2   | 0.49 | 1.54 | 0.04 |

---

|              |      |      |      |
|--------------|------|------|------|
| C16H32O2     | 1.48 | 1.77 | 0.02 |
| C8H11NO2     | 0.37 | 1.98 | 0.00 |
| C36H70O2     | 0.11 | 2.26 | 0.00 |
| C20H41NO3    | 1.84 | 1.71 | 0.02 |
| C21H44O5P    | 2.62 | 1.93 | 0.00 |
| C34H66O4     | 0.15 | 1.70 | 0.02 |
| C68H125NO23  | 0.44 | 2.07 | 0.00 |
| C62H114N2O23 | 2.51 | 2.06 | 0.00 |
| C50H97NO8    | 0.30 | 2.43 | 0.00 |
| C2H6N4O      | 0.76 | 1.66 | 0.02 |
| C11H14NO4P   | 4.07 | 2.16 | 0.00 |
| C30H45N3O9S  | 1.97 | 1.63 | 0.04 |
| C23H31NO2    | 2.94 | 2.20 | 0.00 |
| C11H11NO4    | 1.72 | 1.46 | 0.05 |
| C19H36O3     | 1.32 | 1.88 | 0.01 |
| C21H42O4     | 0.58 | 1.60 | 0.03 |
| C14H16N2O4   | 0.14 | 2.15 | 0.00 |
| C26H45NO     | 0.66 | 1.62 | 0.02 |
| C22H45NO5    | 3.25 | 2.03 | 0.00 |
| C26H53NO3    | 0.79 | 1.68 | 0.03 |
| C32H65NO7    | 0.26 | 1.53 | 0.04 |
| C9H21N3O     | 0.52 | 1.64 | 0.03 |
| C47H85O8P    | 9.35 | 1.92 | 0.01 |
| C46H79O8P    | 7.82 | 2.25 | 0.00 |
| C25H49O8P    | 1.75 | 1.55 | 0.05 |
| C19H39NO3    | 2.10 | 1.72 | 0.02 |
| C20H39NO3S   | 2.95 | 2.03 | 0.00 |
| C38H76NO7P   | 1.63 | 1.93 | 0.01 |
| C39H72NO8P   | 1.42 | 1.95 | 0.00 |
| C47H78NO8P   | 2.78 | 2.07 | 0.00 |
| C43H76NO7P   | 1.25 | 1.89 | 0.01 |
| C49H76NO8P   | 2.61 | 1.99 | 0.00 |
| C37H74NO7P   | 1.42 | 1.71 | 0.02 |
| C21H21O10    | 0.25 | 2.01 | 0.00 |
| C43H85O10P   | 3.47 | 2.10 | 0.00 |
| C42H80O13P2  | 6.63 | 2.01 | 0.00 |
| C42H76O13P2  | 9.03 | 2.16 | 0.00 |
| C34H68NO13P  | 0.37 | 1.52 | 0.04 |
| C37H67O13P   | 0.35 | 1.55 | 0.04 |
| C43H81O13P   | 2.42 | 1.97 | 0.00 |
| C43H79O13P   | 6.06 | 2.23 | 0.00 |
| C48H83O13P   | 4.40 | 1.64 | 0.02 |
| C51H87O13P   | 0.51 | 1.74 | 0.02 |
| C37H73O12P   | 0.26 | 2.15 | 0.00 |

---

|             |      |      |      |
|-------------|------|------|------|
| C41H76O16P2 | 0.42 | 2.17 | 0.00 |
| C42H72NO10P | 1.26 | 1.61 | 0.03 |
| C44H80NO10P | 5.53 | 2.14 | 0.00 |
| C46H78NO10P | 1.60 | 1.53 | 0.05 |
| C46H76NO10P | 7.05 | 2.12 | 0.00 |
| C48H74NO10P | 6.98 | 2.03 | 0.00 |
| C52H98NO10P | 0.03 | 1.77 | 0.02 |
| C40H70NO9P  | 0.31 | 2.06 | 0.00 |
| C6H10OS     | 0.65 | 1.54 | 0.05 |
| C7H19N3     | 0.55 | 1.67 | 0.02 |
| C50H94O6    | 0.41 | 2.43 | 0.00 |
| C61H98O6    | 0.06 | 1.72 | 0.03 |
| C5H6N2O2    | 0.55 | 1.48 | 0.04 |
| C12H24NO4   | 0.85 | 1.62 | 0.03 |
| C10H12N4O6  | 0.69 | 1.62 | 0.03 |

---

**Supplementary table 3 81 metabolites beneficially regulated in prebiotics group vs. sham group.**

| Metabolite                                       | Model vs. Sham FC | Prebiotics vs. Model FC | Trends in prebiotic |
|--------------------------------------------------|-------------------|-------------------------|---------------------|
| 1,2-Epoxy-1,2,7,7',8,8',11',12'-octahydro-psi    | 3.9078            | 0.15305                 | ↓                   |
| 2-Nonyl-1,4,5,6-tetrahydropyrimidine             | 0.089258          | 4.4472                  | ↑                   |
| 22-Hydroxydocos-13-enamide                       | 1.7805            | 0.68089                 | ↓                   |
| 24-ethyl-24-methyl-cholesterol                   | 1.4944            | 0.80435                 | ↓                   |
| 24-Isopropyl-22E-dehydrocholesterol              | 1.4828            | 0.7858                  | ↓                   |
| 3-hydroxypentadecanoyl carnitine                 | 0.27607           | 3.1802                  | ↑                   |
| 3-methyl-4-oxo-1,2-diphenylbutan-2-yl propanoate | 0.36056           | 2.5328                  | ↑                   |
| 7-hydroxy-6-(3-oxobutyl)-2H-chromen-2-one        | 0.082544          | 3.67                    | ↑                   |
| 7a,12a-Dihydroxy-3-oxo-4-cholenoic acid          | 0.55097           | 1.6395                  | ↑                   |
| Acetyl carboxymethyl stearyl glycine             | 0.22832           | 2.5856                  | ↑                   |
| Adrenic acid                                     | 0.23077           | 3.2835                  | ↑                   |
| Cer(d18:1/24:1(15Z))                             | 0.26214           | 9.3041                  | ↑                   |
| Cer(t18:0/16:0)                                  | 3.5836            | 0.11636                 | ↓                   |
| cis-Coutaric acid                                | 0.32937           | 2.336                   | ↑                   |
| Dimethylaurylamine isostearate                   | 4.275             | 0.14303                 | ↓                   |
| Dodecyl butyrate                                 | 0.61125           | 1.4835                  | ↑                   |
| Dotriacontyl methacrylate                        | 3.5373            | 0.10832                 | ↓                   |
| Ethyl 3-(hexadecyloxy)propyl phosphate           | 0.27539           | 2.6196                  | ↑                   |
| FAHFA(16:0/9-O-18:0)                             | 4.2018            | 0.14828                 | ↓                   |
| Ganglioside GA1 (d18:1/18:0)                     | 0.35147           | 2.5148                  | ↑                   |
| Indolepropanol phosphate                         | 0.084962          | 4.0726                  | ↑                   |
| Leukotriene C5                                   | 0.31485           | 1.9694                  | ↑                   |
| Methadyl Acetate                                 | 0.27641           | 2.9402                  | ↑                   |
| N-lactoyl-Tryptophan                             | 2.5601            | 0.13641                 | ↓                   |

|                                                          |          |         |   |
|----------------------------------------------------------|----------|---------|---|
| N,N-Bis(2-hydroxyethyl)palmitamide acetate               | 0.27551  | 3.2497  | ↑ |
| N,N-Bis(4-hydroxybutyl)octadecanamide                    | 1.4713   | 0.79197 | ↓ |
| N,N-Bis{2-[3-(decyloxy)-2-hydroxypropoxy]ethyl}acetamide | 3.2047   | 0.25671 | ↓ |
| PA(20:3(8Z,11Z,14Z)/24:1(15Z))                           | 0.05859  | 9.3535  | ↑ |
| PA(21:0/22:6(4Z,7Z,10Z,13Z,16Z,19Z))                     | 0.073742 | 7.8211  | ↑ |
| Palmitoylhomocysteine                                    | 0.26723  | 2.9455  | ↑ |
| PE(14:0/20:3(8Z,11Z,14Z))                                | 0.49298  | 1.4193  | ↑ |
| PE(20:2(11Z,14Z)/22:6(4Z,7Z,10Z,13Z,16Z,19Z))            | 0.23206  | 2.7755  | ↑ |
| PE(22:6(4Z,7Z,10Z,13Z,16Z,19Z)/22:5(7Z,10Z,13Z,16Z,19Z)) | 0.26226  | 2.6064  | ↑ |
| PG(a-13:0/i-24:0)                                        | 0.1794   | 3.4706  | ↑ |
| PGP(18:1(11Z)/18:1(11Z))                                 | 0.090461 | 6.6282  | ↑ |
| PGP(20:4(5Z,8Z,11Z,14Z)/16:0)                            | 0.07341  | 9.0326  | ↑ |
| PI(16:0/18:1(11Z))                                       | 0.2742   | 2.4151  | ↑ |
| PI(16:0/18:2(9Z,12Z))                                    | 0.11904  | 6.0647  | ↑ |
| PIP(16:1(9Z)/16:1(9Z))                                   | 0.59132  | 0.42408 | ↓ |
| PS(18:0/20:3(8Z,11Z,14Z))                                | 0.1021   | 5.525   | ↑ |
| PS(18:1(11Z)/22:5(4Z,7Z,10Z,13Z,16Z))                    | 0.29935  | 1.5993  | ↑ |
| PS(20:4(8Z,11Z,14Z,17Z)/22:6(4Z,7Z,10Z,13Z,16Z,19Z))     | 0.085305 | 6.9847  | ↑ |
| TG(14:0/15:0/18:1(11Z))                                  | 1.9624   | 0.40722 | ↓ |
| Valerylcarnitine                                         | 1.3927   | 0.8485  | ↓ |
| [4-(3-hydroxybutyl)-2-methoxyphenyl]oxidanesulfonic acid | 1.5236   | 0.86716 | ↓ |
| 2-(2,4,5-trihydroxyphenyl)propanoic acid                 | 0.566    | 2.2238  | ↑ |
| 2-[(2-dodecanoyloxyacetyl)amino]ethyl dodecanoate        | 1.4616   | 0.52634 | ↓ |
| 2-Heptylundecyl diphenyl phosphate                       | 0.52721  | 1.6805  | ↑ |
| 2-Methyl-3-ketovaleric acid                              | 0.46679  | 2.616   | ↑ |
| 3-(4-Methoxybenzoyl)uridine                              | 0.6422   | 1.7494  | ↑ |

|                                                   |          |         |   |
|---------------------------------------------------|----------|---------|---|
| 3-(4-methoxyphenyl)-2-oxopropanoic acid           | 0.35872  | 2.2987  | ↑ |
| 3-Methyl-5-pentyl-2-furanpentanoic acid           | 0.090747 | 7.4476  | ↑ |
| 3,7-dihydroxy-2-phenyl-4H-chromen-4-one           | 0.10253  | 3.4775  | ↑ |
| 3a,7a,12b-Trihydroxy-5b-cholanoic acid            | 0.23943  | 3.2668  | ↑ |
| 6-(Acetyloxy)-2-(7-ethoxy-7-oxoheptyl)undecanoate | 0.312    | 4.0423  | ↑ |
| 6-Ketomyristic acid                               | 0.51895  | 2.1984  | ↑ |
| 7-Ketodeoxycholic acid                            | 0.31766  | 2.5019  | ↑ |
| alpha-Ketoisovaleric acid                         | 0.51469  | 2.3501  | ↑ |
| Benzoic acid                                      | 0.7306   | 1.6451  | ↑ |
| dioctyl bis(2-hydroxyethyl)phosphoramidate        | 0.24105  | 3.2164  | ↑ |
| Indolepropanol phosphate                          | 0.10812  | 3.4331  | ↑ |
| N-(Phenylcarbamoyl)adenosine                      | 0.40181  | 2.2076  | ↑ |
| N-[Ethoxy(phenyl)phosphoryl]-L-threonine          | 1.229    | 0.77759 | ↓ |
| N-Acetylaspartylglutamic acid                     | 1.2385   | 0.78141 | ↓ |
| N-Benzoylaspartic acid                            | 2.3537   | 0.54695 | ↓ |
| N-Octadeca-9,12,15-trienoyl-L-glutamic acid       | 0.32752  | 2.454   | ↑ |
| Oxoglutaric acid                                  | 0.59198  | 1.882   | ↑ |
| PC(15:0/22:4(7Z,10Z,13Z,16Z))                     | 1.8433   | 0.72486 | ↓ |
| PC(O-16:0/20:0)                                   | 2.1828   | 0.45322 | ↓ |
| PE-NMe(16:0/22:4(7Z,10Z,13Z,16Z))                 | 2.0705   | 0.6225  | ↓ |
| PG(17:0/0:0)                                      | 1.7119   | 0.62871 | ↓ |
| PG(17:0/22:4(7Z,10Z,13Z,16Z))                     | 0.11138  | 5.3118  | ↑ |
| PG(17:1(9Z)/22:2(13Z,16Z))                        | 0.21354  | 3.4216  | ↑ |
| PI(16:0/18:1(11Z))                                | 0.45369  | 1.9245  | ↑ |
| PS(14:1(9Z)/24:1(15Z))                            | 0.2199   | 3.3054  | ↑ |
| PS(18:0/20:3(8Z,11Z,14Z))                         | 0.14608  | 4.0165  | ↑ |



---

|                                   |         |         |   |
|-----------------------------------|---------|---------|---|
| PS(18:0/22:5(7Z,10Z,13Z,16Z,19Z)) | 0.45645 | 1.9455  | ↑ |
| PS(DiMe(11,3)/MonoMe(11,3))       | 0.33656 | 2.6147  | ↑ |
| PS(O-18:0/17:0)                   | 1.726   | 0.74269 | ↓ |
| SM(d17:1/24:0)                    | 2.4898  | 0.48485 | ↓ |
| Urocanic acid                     | 0.56225 | 1.8869  | ↑ |

---
